# Supplementary material for: Facile preparation of graphene@polyaniline nanofiber network/oxidized carbon cloth composites for high-performance flexible solid-state supercapacitors
Source: Royal Society of Chemistry journal article supplement (doi:10.1039/d2nr04723c), 2022-01-01
Supplement: d2nr04723c1.pdf [file d2nr04723c1.pdf]

## Supporting Information

### **Facile preparation of graphene@polyaniline nanofiber network/ oxidized carbon cloth composite for high-performance flexible solid-state supercapacitor**

Shaohua Wang <sup>a</sup>, Yuying Li <sup>a</sup>, Xinli Guo <sup>a\*</sup>, Qiang Xu <sup>a</sup>, Qiuping Fu <sup>a</sup>, Yanmei Zheng <sup>a</sup>,  
Weijie Zhang <sup>a</sup>, Zhen Cao <sup>a</sup>, Ruiting Li <sup>a</sup>, and Jingxuan Ren <sup>a</sup>

- a. Jiangsu Key Laboratory of Advanced Metallic Materials, School of Materials Science and Engineering, Southeast University, Nanjing 211189, China
- b. School of Electronic Science & Engineering, Southeast University, Nanjing 210096, China.

#### **Corresponding authors**

\*Emails: Xinli Guo, [guo.xinli@seu.edu.cn](mailto:guo.xinli@seu.edu.cn)

**Number of pages: 5**

**Number of Figures: 7**

**Number of Tables: 2**

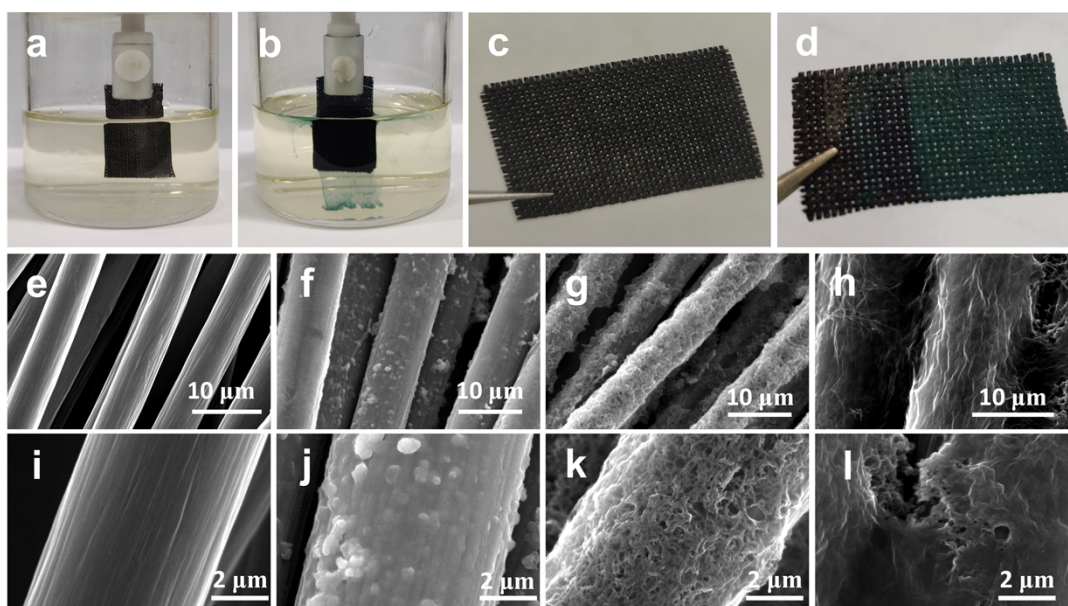

**Fig. S1.** Digital images showing of (a) the process of impregnation of CC in mixed solution of  $\text{H}_2\text{SO}_4$  and aniline, (b) the process of impregnation of  $\text{MnO}_2/\text{OCC}$  in mixed solution of  $\text{H}_2\text{SO}_4$  and aniline, (c) substrate before impregnation( $\text{MnO}_2/\text{OCC}$ ), (d) substrate after impregnation (PANI-NFN/OCC). SEM images of (e, i) CC, (f, j) PANI-NFN/OCC, (g, k) PANI-NFN/OCC and (h, l)  $\text{rGO}@$ PANI-NFN/OCC.

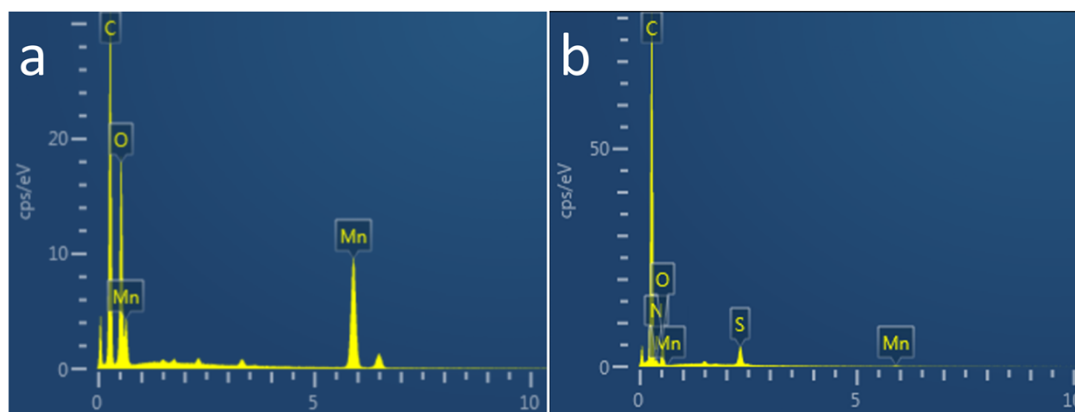

**Fig. S2.** EDS spectra of (a)  $\text{MnO}_2/\text{OCC}$  and (b) PANI-NFN/OCC.

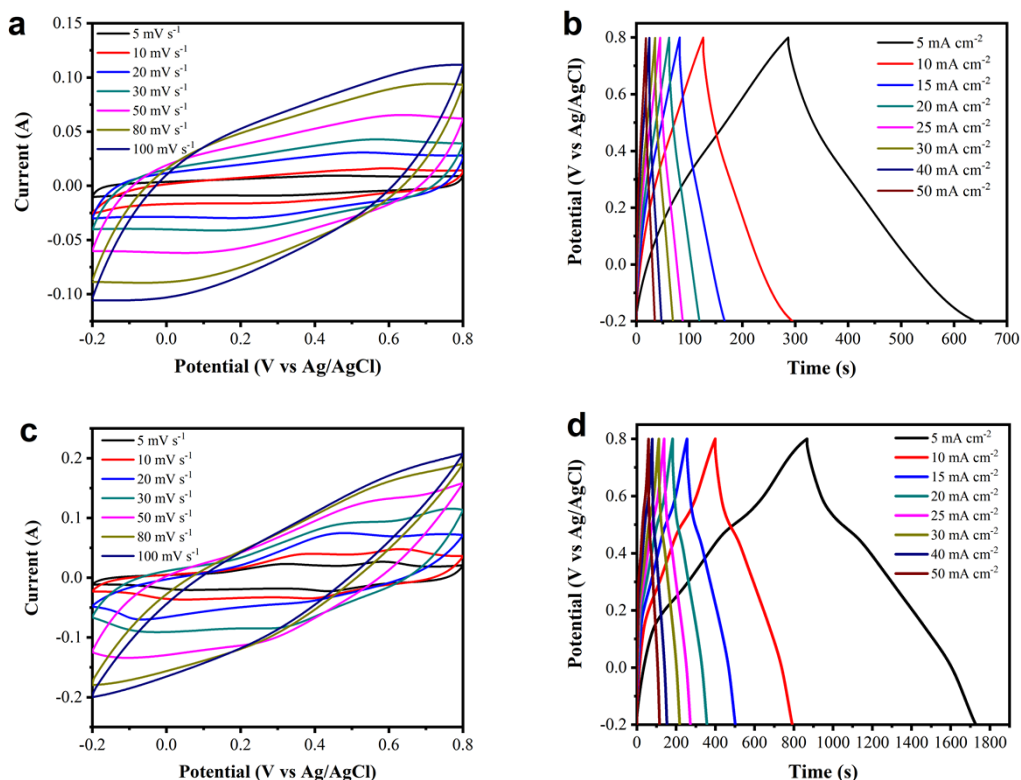

**Fig. S3.** (a) CV curves of MnO<sub>2</sub>/OCC at a scan rate from 5 mV s<sup>-1</sup> to 100 mV s<sup>-1</sup>. (b) GCD curves of MnO<sub>2</sub>/OCC at a current density from 5 mA cm<sup>-2</sup> to 50 mA cm<sup>-2</sup>. (c) CV curves of PANI-NFN/OCC at a scan rate from 5 mV s<sup>-1</sup> to 100 mV s<sup>-1</sup>. (d) GCD curves of PANI-NFN/OCC at a current density from 5 mA cm<sup>-2</sup> to 50 mA cm<sup>-2</sup>.

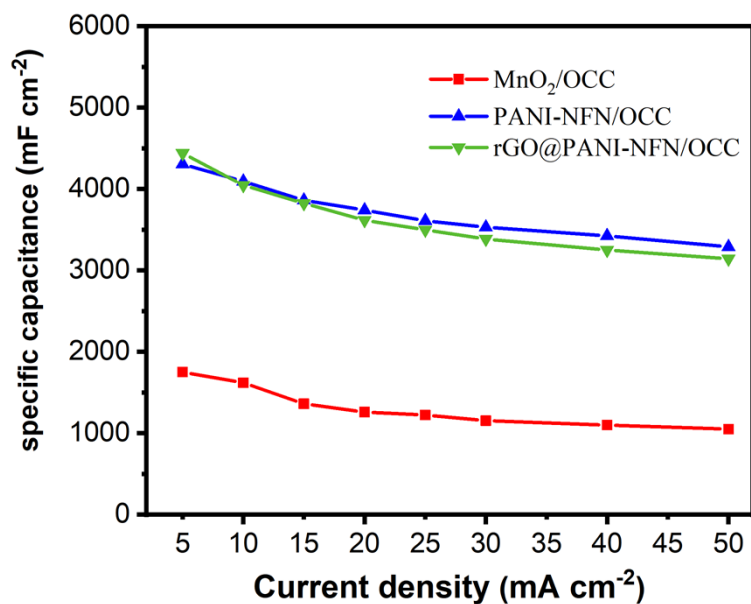

**Fig. S4.** Comparison of areal capacitance of MnO<sub>2</sub>/OCC, PANI-NFN/OCC and rGO@PANI-NFN/OCC.

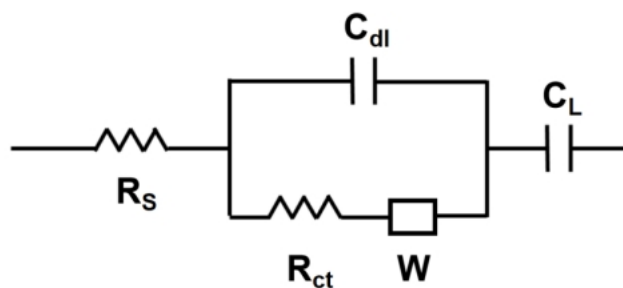

**Fig. S5.** Equivalent circuit model used for EIS data fitting. ( $R_s$ : combined series resistance;  $R_{ct}$ : charge-transfer resistance;  $W$ : Warburg element;  $C_{dl}$ : electrical-double-layer capacitance;  $C_L$ : limit capacitance.)

**Table S1.** Parameter of equivalent circuit elements

| Samples               | $R_s$ ( $\Omega$ ) | $R_{ct}$ ( $\Omega$ ) | $W$ ( $\Omega$ ) | $C_{dl}$ (mF) | $C_L$ (mF) |
|-----------------------|--------------------|-----------------------|------------------|---------------|------------|
| MnO <sub>2</sub> /OCC | 2.061              | 1.166                 | 2.473            | 0.963         | 1.263      |
| PANI-NFN/OCC          | 2.04               | 0.221                 | 1.069            | 3.446         | 0.189      |
| rGO@PANI-NFN/OCC      | 1.833              | 0.082                 | 0.468            | 3.583         | 1.501      |

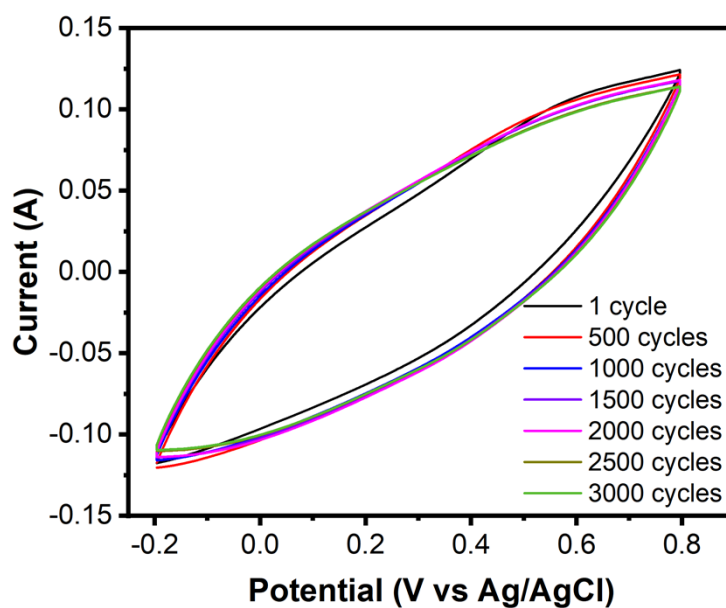

**Fig. S6.** CV curves of rGO@PANI-NFN/OCC during the cycle stability after 1, 500,

1000, 1500, 2000, 2500 and 3000 cycles, respectively.

**Table S2.** Comparison table for the energy storage performance of PANI/carbon material-based composites.

| Sr.no | Electrode Materials       | Electrolyte                        | Areal capacitance                                     | Number of cycles<br>(Capacitance) | Ref.             |
|-------|---------------------------|------------------------------------|-------------------------------------------------------|-----------------------------------|------------------|
| 1.    | PANi-G-GCC                | 1 M H <sub>2</sub> SO <sub>4</sub> | 4520 mF cm <sup>-2</sup> (5 mA cm <sup>-2</sup> )     | 5000(92.7%)                       | 8                |
| 2.    | PANI/CNT/papers           | 1 M H <sub>2</sub> SO <sub>4</sub> | 1506 mF cm <sup>-2</sup> (10 mA cm <sup>-2</sup> )    | 11500(82%)                        | 9                |
| 3.    | FCC-PANI array-rGO        | 1 M H <sub>2</sub> SO <sub>4</sub> | 471 mF cm <sup>-2</sup> (0.5 mA cm <sup>-2</sup> )    | 10000(75.5%)                      | 19               |
| 4.    | PANI/RGO/PMFT             | 1 M H <sub>2</sub> SO <sub>4</sub> | 564 mF cm <sup>-2</sup> (5 mA cm <sup>-2</sup> )      | 10000(94.4)                       | 55               |
| 5.    | Lig/PANI/FGH/FCC          | 1 M H <sub>2</sub> SO <sub>4</sub> | 1223 mF cm <sup>-2</sup> (5 mV s <sup>-1</sup> )      | 5000(81%)                         | 10               |
| 6.    | HA/CNT/PANI fiber         | 1 M H <sub>2</sub> SO <sub>4</sub> | 373 mF cm <sup>-2</sup> (25 mV s <sup>-1</sup> )      | 3000(88.27%)                      | 23               |
| 7.    | FCC-PANI array-C          | 1 M H <sub>2</sub> SO <sub>4</sub> | 1695 mF cm <sup>-2</sup> (0.5 mA cm <sup>-2</sup> )   | 10000(102%)                       | 54               |
| 8.    | PANI nanofiber array/CC   | 1 M H <sub>2</sub> SO <sub>4</sub> | 1459.2 mF cm <sup>-2</sup> (10 mV s <sup>-1</sup> )   | 2000(80%)                         | 11               |
| 9.    | PANI/graphene/textile-HCl | 1 M H <sub>2</sub> SO <sub>4</sub> | 1601 mF cm <sup>-2</sup> (1 mA cm <sup>-2</sup> )     | 10000(75%)                        | 26               |
| 10.   | strawberry-like FCC@PANI  | 1 M H <sub>2</sub> SO <sub>4</sub> | 1859.2 mF cm <sup>-2</sup> (0.2 mA cm <sup>-2</sup> ) | 10000(90.8%)                      | 27               |
| 11.   | PANI/GO/CC                | 1 M H <sub>2</sub> SO <sub>4</sub> | 1122.8 mF cm <sup>-2</sup> (5 mV s <sup>-1</sup> )    | 2000(94.1%)                       | 52               |
| 12.   | rGO@PANI-NFN/OCC          | 1 M H <sub>2</sub> SO <sub>4</sub> | 4438 mF cm <sup>-2</sup> (5 mA cm <sup>-2</sup> )     | 3000(88.2%)                       | <b>This work</b> |

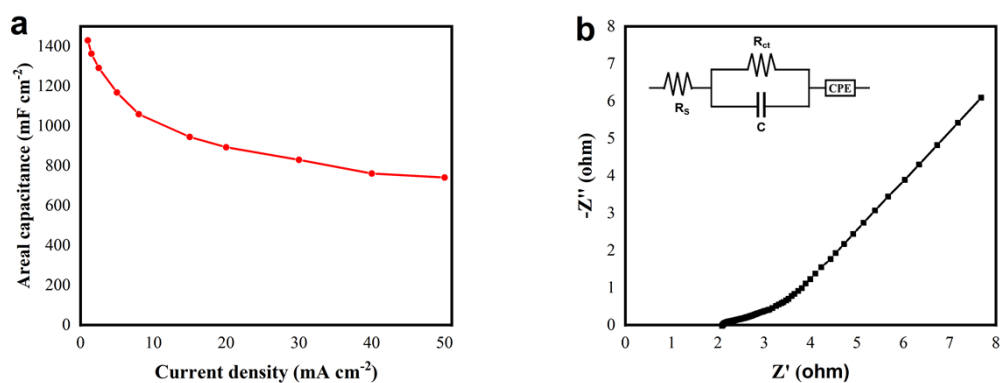

**Fig. S7.** (a) Areal capacitance of FSSCs based on rGO@PANI-NFN/OCC at different current density. (b) Nyquist plots of FSSCs based on rGO@PANI-NFN/OCC, and inset is the equivalent circuit mode of the FSSCs.
